# Supplementary material for: Cocktail Therapy of Fosthiazate and Cupric-Ammoniun Complex for Citrus Huanglongbing
Source: Front Plant Sci. 2021 Mar 31;12:643971. doi: 10.3389/fpls.2021.643971 (PMC8044827; doi:10.3389/fpls.2021.643971)
Supplement: Supplementary file 2 [file Data_Sheet_2.xlsx]

## Sheet: BvsA_KEGGenrich(1)
KEGGID	Description	GeneRatio	BgRatio	pvalue	padj	geneID	geneName	keggID	Count	Up	Up_Gene_names	Down	Down_Gene_names
cic00940	Phenylpropanoid biosynthesis	21/266	154/4434	0.000287124	0.0265904	Ciclev10015870m.g.v1.0/Ciclev10015700m.g.v1.0/Ciclev10012170m.g.v1.0/Ciclev10004697m.g.v1.0/Ciclev10026130m.g.v1.0/Ciclev10005432m.g.v1.0/Ciclev10017786m.g.v1.0/Ciclev10028504m.g.v1.0/Ciclev10032081m.g.v1.0/Ciclev10017908m.g.v1.0/Ciclev10024067m.g.v1.0/Ciclev10023906m.g.v1.0/Ciclev10028018m.g.v1.0/Ciclev10015924m.g.v1.0/Ciclev10006986m.g.v1.0/Ciclev10027084m.g.v1.0/Ciclev10027912m.g.v1.0/Ciclev10…	Ciclev10015870m.g/Ciclev10015700m.g/Ciclev10012170m.g/Ciclev10004697m.g/Ciclev10026130m.g/Ciclev10005432m.g/Ciclev10017786m.g/Ciclev10028504m.g/Ciclev10032081m.g/Ciclev10017908m.g/Ciclev10024067m.g/Ciclev10023906m.g/Ciclev10028018m.g/Ciclev10015924m.g/Ciclev10006986m.g/Ciclev10027084m.g/Ciclev10027912m.g/Ciclev10026050m.g/Ciclev10027308m.g/Ciclev10025462m.g/Ciclev10000921m.g	cic:CICLE_v10015870mg/cic:CICLE_v10015700mg/cic:CICLE_v10012170mg/cic:CICLE_v10004697mg/cic:CICLE_v10026130mg/cic:CICLE_v10005432mg/cic:CICLE_v10017786mg/cic:CICLE_v10028504mg/cic:CICLE_v10032081mg/cic:CICLE_v10017908mg/cic:CICLE_v10024067mg/cic:CICLE_v10023906mg/cic:CICLE_v10028018mg/cic:CICLE_v10015924mg/cic:CICLE_v10006986mg/cic:CICLE_v10027084mg/cic:CICLE_v10027912mg/cic:CICLE_v10026050mg/cic…	21	2	Ciclev10006986m.g.v1.0/Ciclev10025462m.g.v1.0	19	Ciclev10015870m.g.v1.0/Ciclev10015700m.g.v1.0/Ciclev10012170m.g.v1.0/Ciclev10004697m.g.v1.0/Ciclev10026130m.g.v1.0/Ciclev10005432m.g.v1.0/Ciclev10017786m.g.v1.0/Ciclev10028504m.g.v1.0/Ciclev10032081m.g.v1.0/Ciclev10017908m.g.v1.0/Ciclev10024067m.g.v1.0/Ciclev10023906m.g.v1.0/Ciclev10028018m.g.v1.0/Ciclev10015924m.g.v1.0/Ciclev10027084m.g.v1.0/Ciclev10027912m.g.v1.0/Ciclev10026050m.g.v1.0/Ciclev10…
cic00040	Pentose and glucuronate interconversions	12/266	67/4434	0.00052138	0.0265904	Ciclev10014888m.g.v1.0/Ciclev10004783m.g.v1.0/Ciclev10007964m.g.v1.0/Ciclev10010616m.g.v1.0/Ciclev10019202m.g.v1.0/Ciclev10024556m.g.v1.0/Ciclev10019773m.g.v1.0/Ciclev10004719m.g.v1.0/Ciclev10011635m.g.v1.0/Ciclev10025238m.g.v1.0/Ciclev10000705m.g.v1.0/Ciclev10015111m.g.v1.0	Ciclev10014888m.g/Ciclev10004783m.g/Ciclev10007964m.g/Ciclev10010616m.g/Ciclev10019202m.g/Ciclev10024556m.g/Ciclev10019773m.g/Ciclev10004719m.g/Ciclev10011635m.g/Ciclev10025238m.g/Ciclev10000705m.g/Ciclev10015111m.g	cic:CICLE_v10014888mg/cic:CICLE_v10004783mg/cic:CICLE_v10007964mg/cic:CICLE_v10010616mg/cic:CICLE_v10019202mg/cic:CICLE_v10024556mg/cic:CICLE_v10019773mg/cic:CICLE_v10004719mg/cic:CICLE_v10011635mg/cic:CICLE_v10025238mg/cic:CICLE_v10000705mg/cic:CICLE_v10015111mg	12	0		12	Ciclev10014888m.g.v1.0/Ciclev10004783m.g.v1.0/Ciclev10007964m.g.v1.0/Ciclev10010616m.g.v1.0/Ciclev10019202m.g.v1.0/Ciclev10024556m.g.v1.0/Ciclev10019773m.g.v1.0/Ciclev10004719m.g.v1.0/Ciclev10011635m.g.v1.0/Ciclev10025238m.g.v1.0/Ciclev10000705m.g.v1.0/Ciclev10015111m.g.v1.0
cic00941	Flavonoid biosynthesis	9/266	47/4434	0.00159344	0.0541768	Ciclev10028604m.g.v1.0/Ciclev10028605m.g.v1.0/Ciclev10028504m.g.v1.0/Ciclev10001413m.g.v1.0/Ciclev10024067m.g.v1.0/Ciclev10032697m.g.v1.0/Ciclev10006986m.g.v1.0/Ciclev10027308m.g.v1.0/Ciclev10000921m.g.v1.0	Ciclev10028604m.g/Ciclev10028605m.g/Ciclev10028504m.g/Ciclev10001413m.g/Ciclev10024067m.g/Ciclev10032697m.g/Ciclev10006986m.g/Ciclev10027308m.g/Ciclev10000921m.g	cic:CICLE_v10028604mg/cic:CICLE_v10028605mg/cic:CICLE_v10028504mg/cic:CICLE_v10001413mg/cic:CICLE_v10024067mg/cic:CICLE_v10032697mg/cic:CICLE_v10006986mg/cic:CICLE_v10027308mg/cic:CICLE_v10000921mg	9	1	Ciclev10006986m.g.v1.0	8	Ciclev10028604m.g.v1.0/Ciclev10028605m.g.v1.0/Ciclev10028504m.g.v1.0/Ciclev10001413m.g.v1.0/Ciclev10024067m.g.v1.0/Ciclev10032697m.g.v1.0/Ciclev10027308m.g.v1.0/Ciclev10000921m.g.v1.0
cic00945	Stilbenoid, diarylheptanoid and gingerol biosynthesis	6/266	24/4434	0.00236647	0.060345	Ciclev10015708m.g.v1.0/Ciclev10028504m.g.v1.0/Ciclev10024067m.g.v1.0/Ciclev10006986m.g.v1.0/Ciclev10027308m.g.v1.0/Ciclev10000921m.g.v1.0	Ciclev10015708m.g/Ciclev10028504m.g/Ciclev10024067m.g/Ciclev10006986m.g/Ciclev10027308m.g/Ciclev10000921m.g	cic:CICLE_v10015708mg/cic:CICLE_v10028504mg/cic:CICLE_v10024067mg/cic:CICLE_v10006986mg/cic:CICLE_v10027308mg/cic:CICLE_v10000921mg	6	1	Ciclev10006986m.g.v1.0	5	Ciclev10015708m.g.v1.0/Ciclev10028504m.g.v1.0/Ciclev10024067m.g.v1.0/Ciclev10027308m.g.v1.0/Ciclev10000921m.g.v1.0
cic00565	Ether lipid metabolism	5/266	23/4434	0.0103048	0.166137	Ciclev10031232m.g.v1.0/Ciclev10024940m.g.v1.0/Ciclev10010712m.g.v1.0/Ciclev10022647m.g.v1.0/Ciclev10031785m.g.v1.0	Ciclev10031232m.g/Ciclev10024940m.g/Ciclev10010712m.g/Ciclev10022647m.g/Ciclev10031785m.g	cic:CICLE_v10031232mg/cic:CICLE_v10024940mg/cic:CICLE_v10010712mg/cic:CICLE_v10022647mg/cic:CICLE_v10031785mg	5	1	Ciclev10031785m.g.v1.0	4	Ciclev10031232m.g.v1.0/Ciclev10024940m.g.v1.0/Ciclev10010712m.g.v1.0/Ciclev10022647m.g.v1.0
cic03008	Ribosome biogenesis in eukaryotes	10/266	73/4434	0.0110211	0.166137	Ciclev10010984m.g.v1.0/Ciclev10024790m.g.v1.0/Ciclev10025436m.g.v1.0/Ciclev10004122m.g.v1.0/Ciclev10007405m.g.v1.0/Ciclev10018804m.g.v1.0/Ciclev10023744m.g.v1.0/Ciclev10024776m.g.v1.0/Ciclev10021529m.g.v1.0/Ciclev10000087m.g.v1.0	Ciclev10010984m.g/Ciclev10024790m.g/Ciclev10025436m.g/Ciclev10004122m.g/Ciclev10007405m.g/Ciclev10018804m.g/Ciclev10023744m.g/Ciclev10024776m.g/Ciclev10021529m.g/Ciclev10000087m.g	cic:CICLE_v10010984mg/cic:CICLE_v10024790mg/cic:CICLE_v10025436mg/cic:CICLE_v100041222m/cic:CICLE_v10007405mg/cic:CICLE_v10018804mg/cic:CICLE_v10023744mg/cic:CICLE_v10024776mg/cic:CICLE_v10021529mg/cic:CICLE_v10000087mg	10	10	Ciclev10010984m.g.v1.0/Ciclev10024790m.g.v1.0/Ciclev10025436m.g.v1.0/Ciclev10004122m.g.v1.0/Ciclev10007405m.g.v1.0/Ciclev10018804m.g.v1.0/Ciclev10023744m.g.v1.0/Ciclev10024776m.g.v1.0/Ciclev10021529m.g.v1.0/Ciclev10000087m.g.v1.0	0
cic04712	Circadian rhythm - plant	7/266	42/4434	0.0114016	0.166137	Ciclev10028604m.g.v1.0/Ciclev10028605m.g.v1.0/Ciclev10018964m.g.v1.0/Ciclev10023753m.g.v1.0/Ciclev10019177m.g.v1.0/Ciclev10001413m.g.v1.0/Ciclev10021529m.g.v1.0	Ciclev10028604m.g/Ciclev10028605m.g/Ciclev10018964m.g/Ciclev10023753m.g/Ciclev10019177m.g/Ciclev10001413m.g/Ciclev10021529m.g	cic:CICLE_v10028604mg/cic:CICLE_v10028605mg/cic:CICLE_v10018964mg/cic:CICLE_v10023753mg/cic:CICLE_v10019177mg/cic:CICLE_v10001413mg/cic:CICLE_v10021529mg	7	2	Ciclev10019177m.g.v1.0/Ciclev10021529m.g.v1.0	5	Ciclev10028604m.g.v1.0/Ciclev10028605m.g.v1.0/Ciclev10018964m.g.v1.0/Ciclev10023753m.g.v1.0/Ciclev10001413m.g.v1.0
cic00950	Isoquinoline alkaloid biosynthesis	5/266	28/4434	0.0235742	0.300571	Ciclev10008489m.g.v1.0/Ciclev10014992m.g.v1.0/Ciclev10011760m.g.v1.0/Ciclev10004473m.g.v1.0/Ciclev10018100m.g.v1.0	Ciclev10008489m.g/Ciclev10014992m.g/Ciclev10011760m.g/Ciclev10004473m.g/Ciclev10018100m.g	cic:CICLE_v10008489mg/cic:CICLE_v10014992mg/cic:CICLE_v10011760mg/cic:CICLE_v10004473mg/cic:CICLE_v10018100mg	5	0		5	Ciclev10008489m.g.v1.0/Ciclev10014992m.g.v1.0/Ciclev10011760m.g.v1.0/Ciclev10004473m.g.v1.0/Ciclev10018100m.g.v1.0
cic00270	Cysteine and methionine metabolism	11/266	99/4434	0.0335956	0.38075	Ciclev10001793m.g.v1.0/Ciclev10008993m.g.v1.0/Ciclev10025514m.g.v1.0/Ciclev10008489m.g.v1.0/Ciclev10015965m.g.v1.0/Ciclev10011760m.g.v1.0/Ciclev10000487m.g.v1.0/Ciclev10001439m.g.v1.0/Ciclev10000651m.g.v1.0/Ciclev10016114m.g.v1.0/Ciclev10014232m.g.v1.0	Ciclev10001793m.g/Ciclev10008993m.g/Ciclev10025514m.g/Ciclev10008489m.g/Ciclev10015965m.g/Ciclev10011760m.g/Ciclev10000487m.g/Ciclev10001439m.g/Ciclev10000651m.g/Ciclev10016114m.g/Ciclev10014232m.g	cic:CICLE_v10001793mg/cic:CICLE_v10008993mg/cic:CICLE_v10011621mg/cic:CICLE_v10008489mg/cic:CICLE_v10015965mg/cic:CICLE_v10011760mg/cic:CICLE_v100004871m/cic:CICLE_v10001439mg/cic:CICLE_v10000651mg/cic:CICLE_v10016114mg/cic:CICLE_v10014232mg	11	2	Ciclev10001793m.g.v1.0/Ciclev10000651m.g.v1.0	9	Ciclev10008993m.g.v1.0/Ciclev10025514m.g.v1.0/Ciclev10008489m.g.v1.0/Ciclev10015965m.g.v1.0/Ciclev10011760m.g.v1.0/Ciclev10000487m.g.v1.0/Ciclev10001439m.g.v1.0/Ciclev10016114m.g.v1.0/Ciclev10014232m.g.v1.0
cic00073	Cutin, suberine and wax biosynthesis	4/266	23/4434	0.0454754	0.386278	Ciclev10031117m.g.v1.0/Ciclev10019616m.g.v1.0/Ciclev10010432m.g.v1.0/Ciclev10030097m.g.v1.0	Ciclev10031117m.g/Ciclev10019616m.g/Ciclev10010432m.g/Ciclev10030097m.g	cic:CICLE_v10031117mg/cic:CICLE_v10019616mg/cic:CICLE_v10010432mg/cic:CICLE_v10030097mg	4	0		4	Ciclev10031117m.g.v1.0/Ciclev10019616m.g.v1.0/Ciclev10010432m.g.v1.0/Ciclev10030097m.g.v1.0
cic00130	Ubiquinone and other terpenoid-quinone biosynthesis	7/266	56/4434	0.0482508	0.386278	Ciclev10008503m.g.v1.0/Ciclev10017775m.g.v1.0/Ciclev10032730m.g.v1.0/Ciclev10021032m.g.v1.0/Ciclev10010546m.g.v1.0/Ciclev10027371m.g.v1.0/Ciclev10000921m.g.v1.0	Ciclev10008503m.g/Ciclev10017775m.g/Ciclev10032730m.g/Ciclev10021032m.g/Ciclev10010546m.g/Ciclev10027371m.g/Ciclev10000921m.g	cic:CICLE_v10008503mg/cic:CICLE_v10017775mg/cic:CICLE_v10008872mg/cic:CICLE_v10021032mg/cic:CICLE_v10010546mg/cic:CICLE_v10027371mg/cic:CICLE_v10000921mg	7	2	Ciclev10008503m.g.v1.0/Ciclev10032730m.g.v1.0	5	Ciclev10017775m.g.v1.0/Ciclev10021032m.g.v1.0/Ciclev10010546m.g.v1.0/Ciclev10027371m.g.v1.0/Ciclev10000921m.g.v1.0
cic04016	MAPK signaling pathway - plant	11/266	107/4434	0.0543213	0.386278	Ciclev10005200m.g.v1.0/Ciclev10024251m.g.v1.0/Ciclev10018646m.g.v1.0/Ciclev10025314m.g.v1.0/Ciclev10027552m.g.v1.0/Ciclev10023343m.g.v1.0/Ciclev10028959m.g.v1.0/Ciclev10029459m.g.v1.0/Ciclev10023463m.g.v1.0/Ciclev10008610m.g.v1.0/Ciclev10031682m.g.v1.0	Ciclev10005200m.g/Ciclev10024251m.g/Ciclev10018646m.g/Ciclev10025314m.g/Ciclev10027552m.g/Ciclev10023343m.g/Ciclev10028959m.g/Ciclev10029459m.g/Ciclev10023463m.g/Ciclev10008610m.g/Ciclev10031682m.g	cic:CICLE_v10005200mg/cic:CICLE_v10024251mg/cic:CICLE_v10024610mg/cic:CICLE_v10025314mg/cic:CICLE_v10027552mg/cic:CICLE_v10023343mg/cic:CICLE_v10028959mg/cic:CICLE_v10029459mg/cic:CICLE_v10023463mg/cic:CICLE_v100086102m/cic:CICLE_v10031682mg	11	5	Ciclev10005200m.g.v1.0/Ciclev10025314m.g.v1.0/Ciclev10023343m.g.v1.0/Ciclev10008610m.g.v1.0/Ciclev10031682m.g.v1.0	6	Ciclev10024251m.g.v1.0/Ciclev10018646m.g.v1.0/Ciclev10027552m.g.v1.0/Ciclev10028959m.g.v1.0/Ciclev10029459m.g.v1.0/Ciclev10023463m.g.v1.0
cic00360	Phenylalanine metabolism	6/266	46/4434	0.0548375	0.386278	Ciclev10008489m.g.v1.0/Ciclev10014992m.g.v1.0/Ciclev10011760m.g.v1.0/Ciclev10004473m.g.v1.0/Ciclev10027912m.g.v1.0/Ciclev10018100m.g.v1.0	Ciclev10008489m.g/Ciclev10014992m.g/Ciclev10011760m.g/Ciclev10004473m.g/Ciclev10027912m.g/Ciclev10018100m.g	cic:CICLE_v10008489mg/cic:CICLE_v10014992mg/cic:CICLE_v10011760mg/cic:CICLE_v10004473mg/cic:CICLE_v10027912mg/cic:CICLE_v10018100mg	6	0		6	Ciclev10008489m.g.v1.0/Ciclev10014992m.g.v1.0/Ciclev10011760m.g.v1.0/Ciclev10004473m.g.v1.0/Ciclev10027912m.g.v1.0/Ciclev10018100m.g.v1.0
cic00531	Glycosaminoglycan degradation	3/266	15/4434	0.0568056	0.386278	Ciclev10014808m.g.v1.0/Ciclev10028441m.g.v1.0/Ciclev10019304m.g.v1.0	Ciclev10014808m.g/Ciclev10028441m.g/Ciclev10019304m.g	cic:CICLE_v10014808mg/cic:CICLE_v10028441mg/cic:CICLE_v10019304mg	3	1	Ciclev10028441m.g.v1.0	2	Ciclev10014808m.g.v1.0/Ciclev10019304m.g.v1.0
cic00750	Vitamin B6 metabolism	3/266	15/4434	0.0568056	0.386278	Ciclev10026152m.g.v1.0/Ciclev10026215m.g.v1.0/Ciclev10026096m.g.v1.0	Ciclev10026152m.g/Ciclev10026215m.g/Ciclev10026096m.g	cic:CICLE_v10026152mg/cic:CICLE_v10026215mg/cic:CICLE_v10026096mg	3	0		3	Ciclev10026152m.g.v1.0/Ciclev10026215m.g.v1.0/Ciclev10026096m.g.v1.0
cic00350	Tyrosine metabolism	6/266	48/4434	0.0651198	0.401512	Ciclev10008489m.g.v1.0/Ciclev10014992m.g.v1.0/Ciclev10011760m.g.v1.0/Ciclev10004473m.g.v1.0/Ciclev10001502m.g.v1.0/Ciclev10018100m.g.v1.0	Ciclev10008489m.g/Ciclev10014992m.g/Ciclev10011760m.g/Ciclev10004473m.g/Ciclev10001502m.g/Ciclev10018100m.g	cic:CICLE_v10008489mg/cic:CICLE_v10014992mg/cic:CICLE_v10011760mg/cic:CICLE_v10004473mg/cic:CICLE_v10001500mg/cic:CICLE_v10018100mg	6	0		6	Ciclev10008489m.g.v1.0/Ciclev10014992m.g.v1.0/Ciclev10011760m.g.v1.0/Ciclev10004473m.g.v1.0/Ciclev10001502m.g.v1.0/Ciclev10018100m.g.v1.0
cic00196	Photosynthesis - antenna proteins	3/266	16/4434	0.0669186	0.401512	Ciclev10031886m.g.v1.0/Ciclev10021452m.g.v1.0/Ciclev10016280m.g.v1.0	Ciclev10031886m.g/Ciclev10021452m.g/Ciclev10016280m.g	cic:CICLE_v10031886mg/cic:CICLE_v10021452mg/cic:CICLE_v10016280mg	3	0		3	Ciclev10031886m.g.v1.0/Ciclev10021452m.g.v1.0/Ciclev10016280m.g.v1.0
cic00052	Galactose metabolism	6/266	50/4434	0.0764582	0.417601	Ciclev10006437m.g.v1.0/Ciclev10015031m.g.v1.0/Ciclev10018822m.g.v1.0/Ciclev10000939m.g.v1.0/Ciclev10008181m.g.v1.0/Ciclev10030449m.g.v1.0	Ciclev10006437m.g/Ciclev10015031m.g/Ciclev10018822m.g/Ciclev10000939m.g/Ciclev10008181m.g/Ciclev10030449m.g	cic:CICLE_v10006437mg/cic:CICLE_v10015031mg/cic:CICLE_v10018822mg/cic:CICLE_v10000939mg/cic:CICLE_v10008181mg/cic:CICLE_v100304491m	6	3	Ciclev10006437m.g.v1.0/Ciclev10015031m.g.v1.0/Ciclev10018822m.g.v1.0	3	Ciclev10000939m.g.v1.0/Ciclev10008181m.g.v1.0/Ciclev10030449m.g.v1.0
cic01040	Biosynthesis of unsaturated fatty acids	3/266	17/4434	0.0777884	0.417601	Ciclev10001443m.g.v1.0/Ciclev10001415m.g.v1.0/Ciclev10001459m.g.v1.0	Ciclev10001443m.g/Ciclev10001415m.g/Ciclev10001459m.g	cic:CICLE_v10001443mg/cic:CICLE_v10001415mg/cic:CICLE_v10001459mg	3	2	Ciclev10001415m.g.v1.0/Ciclev10001459m.g.v1.0	1	Ciclev10001443m.g.v1.0
cic00710	Carbon fixation in photosynthetic organisms	6/266	57/4434	0.124252	0.630933	Ciclev10032014m.g.v1.0/Ciclev10033603m.g.v1.0/Ciclev10031559m.g.v1.0/Ciclev10008489m.g.v1.0/Ciclev10011760m.g.v1.0/Ciclev10016114m.g.v1.0	Ciclev10032014m.g/Ciclev10033603m.g/Ciclev10031559m.g/Ciclev10008489m.g/Ciclev10011760m.g/Ciclev10016114m.g	cic:CICLE_v10032014mg/cic:CICLE_v10033603mg/cic:CICLE_v10031559mg/cic:CICLE_v10008489mg/cic:CICLE_v10011760mg/cic:CICLE_v10016114mg	6	2	Ciclev10033603m.g.v1.0/Ciclev10031559m.g.v1.0	4	Ciclev10032014m.g.v1.0/Ciclev10008489m.g.v1.0/Ciclev10011760m.g.v1.0/Ciclev10016114m.g.v1.0
cic03030	DNA replication	5/266	45/4434	0.129898	0.630933	Ciclev10016103m.g.v1.0/Ciclev10031511m.g.v1.0/Ciclev10030973m.g.v1.0/Ciclev10019317m.g.v1.0/Ciclev10017750m.g.v1.0	Ciclev10016103m.g/Ciclev10031511m.g/Ciclev10030973m.g/Ciclev10019317m.g/Ciclev10017750m.g	cic:CICLE_v10016103mg/cic:CICLE_v10031511mg/cic:CICLE_v10030973mg/cic:CICLE_v10019317mg/cic:CICLE_v10017750mg	5	0		5	Ciclev10016103m.g.v1.0/Ciclev10031511m.g.v1.0/Ciclev10030973m.g.v1.0/Ciclev10019317m.g.v1.0/Ciclev10017750m.g.v1.0
cic00511	Other glycan degradation	3/266	22/4434	0.141969	0.637605	Ciclev10014808m.g.v1.0/Ciclev10004832m.g.v1.0/Ciclev10018742m.g.v1.0	Ciclev10014808m.g/Ciclev10004832m.g/Ciclev10018742m.g	cic:CICLE_v10014808mg/cic:CICLE_v10004832mg/cic:CICLE_v10018742mg	3	1	Ciclev10018742m.g.v1.0	2	Ciclev10014808m.g.v1.0/Ciclev10004832m.g.v1.0
cic00960	Tropane, piperidine and pyridine alkaloid biosynthesis	4/266	34/4434	0.143774	0.637605	Ciclev10008489m.g.v1.0/Ciclev10011760m.g.v1.0/Ciclev10004473m.g.v1.0/Ciclev10029051m.g.v1.0	Ciclev10008489m.g/Ciclev10011760m.g/Ciclev10004473m.g/Ciclev10029051m.g	cic:CICLE_v10008489mg/cic:CICLE_v10011760mg/cic:CICLE_v10004473mg/cic:CICLE_v10029051mg	4	1	Ciclev10029051m.g.v1.0	3	Ciclev10008489m.g.v1.0/Ciclev10011760m.g.v1.0/Ciclev10004473m.g.v1.0
cic00500	Starch and sucrose metabolism	11/266	132/4434	0.166609	0.708087	Ciclev10017787m.g.v1.0/Ciclev10001266m.g.v1.0/Ciclev10000600m.g.v1.0/Ciclev10019602m.g.v1.0/Ciclev10023395m.g.v1.0/Ciclev10014994m.g.v1.0/Ciclev10000939m.g.v1.0/Ciclev10018889m.g.v1.0/Ciclev10028018m.g.v1.0/Ciclev10030449m.g.v1.0/Ciclev10010343m.g.v1.0	Ciclev10017787m.g/Ciclev10001266m.g/Ciclev10000600m.g/Ciclev10019602m.g/Ciclev10023395m.g/Ciclev10014994m.g/Ciclev10000939m.g/Ciclev10018889m.g/Ciclev10028018m.g/Ciclev10030449m.g/Ciclev10010343m.g	cic:CICLE_v10018748mg/cic:CICLE_v10001266mg/cic:CICLE_v10000600mg/cic:CICLE_v10019602mg/cic:CICLE_v10023395mg/cic:CICLE_v10014994mg/cic:CICLE_v10000939mg/cic:CICLE_v10004341mg/cic:CICLE_v10028018mg/cic:CICLE_v100304491m/cic:CICLE_v10010343mg	11	0		11	Ciclev10017787m.g.v1.0/Ciclev10001266m.g.v1.0/Ciclev10000600m.g.v1.0/Ciclev10019602m.g.v1.0/Ciclev10023395m.g.v1.0/Ciclev10014994m.g.v1.0/Ciclev10000939m.g.v1.0/Ciclev10018889m.g.v1.0/Ciclev10028018m.g.v1.0/Ciclev10030449m.g.v1.0/Ciclev10010343m.g.v1.0
cic04075	Plant hormone signal transduction	18/266	238/4434	0.180861	0.737914	Ciclev10005200m.g.v1.0/Ciclev10025314m.g.v1.0/Ciclev10029493m.g.v1.0/Ciclev10028271m.g.v1.0/Ciclev10027552m.g.v1.0/Ciclev10001416m.g.v1.0/Ciclev10023343m.g.v1.0/Ciclev10022370m.g.v1.0/Ciclev10001072m.g.v1.0/Ciclev10002569m.g.v1.0/Ciclev10022032m.g.v1.0/Ciclev10029459m.g.v1.0/Ciclev10030256m.g.v1.0/Ciclev10003150m.g.v1.0/Ciclev10008610m.g.v1.0/Ciclev10022912m.g.v1.0/Ciclev10024737m.g.v1.0/Ciclev10…	Ciclev10005200m.g/Ciclev10025314m.g/Ciclev10029493m.g/Ciclev10028271m.g/Ciclev10027552m.g/Ciclev10001416m.g/Ciclev10023343m.g/Ciclev10022370m.g/Ciclev10001072m.g/Ciclev10002569m.g/Ciclev10022032m.g/Ciclev10029459m.g/Ciclev10030256m.g/Ciclev10003150m.g/Ciclev10008610m.g/Ciclev10022912m.g/Ciclev10024737m.g/Ciclev10031682m.g	cic:CICLE_v10005200mg/cic:CICLE_v10025314mg/cic:CICLE_v10029493mg/cic:CICLE_v10028271mg/cic:CICLE_v10027552mg/cic:CICLE_v10001416mg/cic:CICLE_v10023343mg/cic:CICLE_v10022370mg/cic:CICLE_v10001072mg/cic:CICLE_v10002569mg/cic:CICLE_v10022032mg/cic:CICLE_v10029459mg/cic:CICLE_v10030256mg/cic:CICLE_v10003150mg/cic:CICLE_v100086102m/cic:CICLE_v10022912mg/cic:CICLE_v10024737mg/cic:CICLE_v10031682mg	18	7	Ciclev10005200m.g.v1.0/Ciclev10025314m.g.v1.0/Ciclev10029493m.g.v1.0/Ciclev10023343m.g.v1.0/Ciclev10008610m.g.v1.0/Ciclev10022912m.g.v1.0/Ciclev10031682m.g.v1.0	11	Ciclev10028271m.g.v1.0/Ciclev10027552m.g.v1.0/Ciclev10001416m.g.v1.0/Ciclev10022370m.g.v1.0/Ciclev10001072m.g.v1.0/Ciclev10002569m.g.v1.0/Ciclev10022032m.g.v1.0/Ciclev10029459m.g.v1.0/Ciclev10030256m.g.v1.0/Ciclev10003150m.g.v1.0/Ciclev10024737m.g.v1.0
cic00564	Glycerophospholipid metabolism	7/266	79/4434	0.193626	0.741371	Ciclev10031232m.g.v1.0/Ciclev10001108m.g.v1.0/Ciclev10024940m.g.v1.0/Ciclev10010712m.g.v1.0/Ciclev10022647m.g.v1.0/Ciclev10031785m.g.v1.0/Ciclev10028764m.g.v1.0	Ciclev10031232m.g/Ciclev10001108m.g/Ciclev10024940m.g/Ciclev10010712m.g/Ciclev10022647m.g/Ciclev10031785m.g/Ciclev10028764m.g	cic:CICLE_v10031232mg/cic:CICLE_v10001108mg/cic:CICLE_v10024940mg/cic:CICLE_v10010712mg/cic:CICLE_v10022647mg/cic:CICLE_v10031785mg/cic:CICLE_v10028764mg	7	2	Ciclev10001108m.g.v1.0/Ciclev10031785m.g.v1.0	5	Ciclev10031232m.g.v1.0/Ciclev10024940m.g.v1.0/Ciclev10010712m.g.v1.0/Ciclev10022647m.g.v1.0/Ciclev10028764m.g.v1.0
cic00590	Arachidonic acid metabolism	2/266	14/4434	0.203514	0.741371	Ciclev10022647m.g.v1.0/Ciclev10022130m.g.v1.0	Ciclev10022647m.g/Ciclev10022130m.g	cic:CICLE_v10022647mg/cic:CICLE_v10022130mg	2	1	Ciclev10022130m.g.v1.0	1	Ciclev10022647m.g.v1.0
cic00591	Linoleic acid metabolism	2/266	14/4434	0.203514	0.741371	Ciclev10014260m.g.v1.0/Ciclev10022647m.g.v1.0	Ciclev10014260m.g/Ciclev10022647m.g	cic:CICLE_v10014260mg/cic:CICLE_v10022647mg	2	0		2	Ciclev10014260m.g.v1.0/Ciclev10022647m.g.v1.0
cic00592	alpha-Linolenic acid metabolism	4/266	40/4434	0.216541	0.74943	Ciclev10014260m.g.v1.0/Ciclev10022647m.g.v1.0/Ciclev10001502m.g.v1.0/Ciclev10028333m.g.v1.0	Ciclev10014260m.g/Ciclev10022647m.g/Ciclev10001502m.g/Ciclev10028333m.g	cic:CICLE_v10014260mg/cic:CICLE_v10022647mg/cic:CICLE_v10001500mg/cic:CICLE_v10028333mg	4	1	Ciclev10028333m.g.v1.0	3	Ciclev10014260m.g.v1.0/Ciclev10022647m.g.v1.0/Ciclev10001502m.g.v1.0
cic03410	Base excision repair	4/266	41/4434	0.229546	0.74943	Ciclev10032151m.g.v1.0/Ciclev10012868m.g.v1.0/Ciclev10005040m.g.v1.0/Ciclev10027891m.g.v1.0	Ciclev10032151m.g/Ciclev10012868m.g/Ciclev10005040m.g/Ciclev10027891m.g	cic:CICLE_v10032151mg/cic:CICLE_v10012868mg/cic:CICLE_v10005040mg/cic:CICLE_v10027891mg	4	2	Ciclev10012868m.g.v1.0/Ciclev10027891m.g.v1.0	2	Ciclev10032151m.g.v1.0/Ciclev10005040m.g.v1.0
cic00260	Glycine, serine and threonine metabolism	5/266	55/4434	0.232356	0.74943	Ciclev10025514m.g.v1.0/Ciclev10008459m.g.v1.0/Ciclev10004473m.g.v1.0/Ciclev10026175m.g.v1.0/Ciclev10000651m.g.v1.0	Ciclev10025514m.g/Ciclev10008459m.g/Ciclev10004473m.g/Ciclev10026175m.g/Ciclev10000651m.g	cic:CICLE_v10011621mg/cic:CICLE_v10008459mg/cic:CICLE_v10004473mg/cic:CICLE_v10026175mg/cic:CICLE_v10000651mg	5	2	Ciclev10026175m.g.v1.0/Ciclev10000651m.g.v1.0	3	Ciclev10025514m.g.v1.0/Ciclev10008459m.g.v1.0/Ciclev10004473m.g.v1.0
cic00061	Fatty acid biosynthesis	4/266	42/4434	0.242741	0.74943	Ciclev10001443m.g.v1.0/Ciclev10001415m.g.v1.0/Ciclev10027967m.g.v1.0/Ciclev10001459m.g.v1.0	Ciclev10001443m.g/Ciclev10001415m.g/Ciclev10027967m.g/Ciclev10001459m.g	cic:CICLE_v10001443mg/cic:CICLE_v10001415mg/cic:CICLE_v10027967mg/cic:CICLE_v10001459mg	4	2	Ciclev10001415m.g.v1.0/Ciclev10001459m.g.v1.0	2	Ciclev10001443m.g.v1.0/Ciclev10027967m.g.v1.0
cic01200	Carbon metabolism	16/266	220/4434	0.244543	0.74943	Ciclev10032014m.g.v1.0/Ciclev10001793m.g.v1.0/Ciclev10033603m.g.v1.0/Ciclev10031559m.g.v1.0/Ciclev10008489m.g.v1.0/Ciclev10032834m.g.v1.0/Ciclev10011760m.g.v1.0/Ciclev10015031m.g.v1.0/Ciclev10000939m.g.v1.0/Ciclev10014598m.g.v1.0/Ciclev10015533m.g.v1.0/Ciclev10008181m.g.v1.0/Ciclev10025922m.g.v1.0/Ciclev10026175m.g.v1.0/Ciclev10000651m.g.v1.0/Ciclev10016114m.g.v1.0	Ciclev10032014m.g/Ciclev10001793m.g/Ciclev10033603m.g/Ciclev10031559m.g/Ciclev10008489m.g/Ciclev10032834m.g/Ciclev10011760m.g/Ciclev10015031m.g/Ciclev10000939m.g/Ciclev10014598m.g/Ciclev10015533m.g/Ciclev10008181m.g/Ciclev10025922m.g/Ciclev10026175m.g/Ciclev10000651m.g/Ciclev10016114m.g	cic:CICLE_v10032014mg/cic:CICLE_v10001793mg/cic:CICLE_v10033603mg/cic:CICLE_v10031559mg/cic:CICLE_v10008489mg/cic:CICLE_v10032834mg/cic:CICLE_v10011760mg/cic:CICLE_v10015031mg/cic:CICLE_v10000939mg/cic:CICLE_v10014598mg/cic:CICLE_v10015533mg/cic:CICLE_v10008181mg/cic:CICLE_v10025729mg/cic:CICLE_v10026175mg/cic:CICLE_v10000651mg/cic:CICLE_v10016114mg	16	9	Ciclev10001793m.g.v1.0/Ciclev10033603m.g.v1.0/Ciclev10031559m.g.v1.0/Ciclev10032834m.g.v1.0/Ciclev10015031m.g.v1.0/Ciclev10015533m.g.v1.0/Ciclev10025922m.g.v1.0/Ciclev10026175m.g.v1.0/Ciclev10000651m.g.v1.0	7	Ciclev10032014m.g.v1.0/Ciclev10008489m.g.v1.0/Ciclev10011760m.g.v1.0/Ciclev10000939m.g.v1.0/Ciclev10014598m.g.v1.0/Ciclev10008181m.g.v1.0/Ciclev10016114m.g.v1.0
cic00480	Glutathione metabolism	8/266	100/4434	0.24981	0.74943	Ciclev10029241m.g.v1.0/Ciclev10005843m.g.v1.0/Ciclev10024585m.g.v1.0/Ciclev10002119m.g.v1.0/Ciclev10006532m.g.v1.0/Ciclev10032696m.g.v1.0/Ciclev10022130m.g.v1.0/Ciclev10032686m.g.v1.0	Ciclev10029241m.g/Ciclev10005843m.g/Ciclev10024585m.g/Ciclev10002119m.g/Ciclev10006532m.g/Ciclev10032696m.g/Ciclev10022130m.g/Ciclev10032686m.g	cic:CICLE_v10029241mg/cic:CICLE_v10005843mg/cic:CICLE_v10024585mg/cic:CICLE_v10002119mg/cic:CICLE_v10006532mg/cic:CICLE_v10032696mg/cic:CICLE_v10022130mg/cic:CICLE_v10032686mg	8	6	Ciclev10005843m.g.v1.0/Ciclev10024585m.g.v1.0/Ciclev10006532m.g.v1.0/Ciclev10032696m.g.v1.0/Ciclev10022130m.g.v1.0/Ciclev10032686m.g.v1.0	2	Ciclev10029241m.g.v1.0/Ciclev10002119m.g.v1.0
cic00920	Sulfur metabolism	3/266	30/4434	0.267282	0.778935	Ciclev10001793m.g.v1.0/Ciclev10001007m.g.v1.0/Ciclev10021343m.g.v1.0	Ciclev10001793m.g/Ciclev10001007m.g/Ciclev10021343m.g	cic:CICLE_v10001793mg/cic:CICLE_v10001007mg/cic:CICLE_v10021343mg	3	2	Ciclev10001793m.g.v1.0/Ciclev10021343m.g.v1.0	1	Ciclev10001007m.g.v1.0
cic00010	Glycolysis / Gluconeogenesis	8/266	103/4434	0.275813	0.780825	Ciclev10032014m.g.v1.0/Ciclev10015031m.g.v1.0/Ciclev10000939m.g.v1.0/Ciclev10008181m.g.v1.0/Ciclev10011317m.g.v1.0/Ciclev10001502m.g.v1.0/Ciclev10026175m.g.v1.0/Ciclev10014703m.g.v1.0	Ciclev10032014m.g/Ciclev10015031m.g/Ciclev10000939m.g/Ciclev10008181m.g/Ciclev10011317m.g/Ciclev10001502m.g/Ciclev10026175m.g/Ciclev10014703m.g	cic:CICLE_v10032014mg/cic:CICLE_v10015031mg/cic:CICLE_v10000939mg/cic:CICLE_v10008181mg/cic:CICLE_v10011317mg/cic:CICLE_v10001500mg/cic:CICLE_v10026175mg/cic:CICLE_v10014703mg	8	2	Ciclev10015031m.g.v1.0/Ciclev10026175m.g.v1.0	6	Ciclev10032014m.g.v1.0/Ciclev10000939m.g.v1.0/Ciclev10008181m.g.v1.0/Ciclev10011317m.g.v1.0/Ciclev10001502m.g.v1.0/Ciclev10014703m.g.v1.0
cic00030	Pentose phosphate pathway	4/266	45/4434	0.28324	0.780825	Ciclev10033603m.g.v1.0/Ciclev10032834m.g.v1.0/Ciclev10015031m.g.v1.0/Ciclev10008181m.g.v1.0	Ciclev10033603m.g/Ciclev10032834m.g/Ciclev10015031m.g/Ciclev10008181m.g	cic:CICLE_v10033603mg/cic:CICLE_v10032834mg/cic:CICLE_v10015031mg/cic:CICLE_v10008181mg	4	3	Ciclev10033603m.g.v1.0/Ciclev10032834m.g.v1.0/Ciclev10015031m.g.v1.0	1	Ciclev10008181m.g.v1.0
cic02010	ABC transporters	3/266	32/4434	0.300689	0.807114	Ciclev10000054m.g.v1.0/Ciclev10010933m.g.v1.0/Ciclev10010930m.g.v1.0	Ciclev10000054m.g/Ciclev10010933m.g/Ciclev10010930m.g	cic:CICLE_v10000054mg/cic:CICLE_v10010933mg/cic:CICLE_v10010930mg	3	1	Ciclev10010930m.g.v1.0	2	Ciclev10000054m.g.v1.0/Ciclev10010933m.g.v1.0
cic00290	Valine, leucine and isoleucine biosynthesis	2/266	19/4434	0.317088	0.80769	Ciclev10007130m.g.v1.0/Ciclev10001439m.g.v1.0	Ciclev10007130m.g/Ciclev10001439m.g	cic:CICLE_v10007130mg/cic:CICLE_v10001439mg	2	0		2	Ciclev10007130m.g.v1.0/Ciclev10001439m.g.v1.0
cic00100	Steroid biosynthesis	3/266	33/4434	0.317485	0.80769	Ciclev10007532m.g.v1.0/Ciclev10006027m.g.v1.0/Ciclev10015400m.g.v1.0	Ciclev10007532m.g/Ciclev10006027m.g/Ciclev10015400m.g	cic:CICLE_v10007532mg/cic:CICLE_v10006027mg/cic:CICLE_v10015400mg	3	0		3	Ciclev10007532m.g.v1.0/Ciclev10006027m.g.v1.0/Ciclev10015400m.g.v1.0
cic00240	Pyrimidine metabolism	4/266	48/4434	0.32466	0.80769	Ciclev10022875m.g.v1.0/Ciclev10016471m.g.v1.0/Ciclev10013384m.g.v1.0/Ciclev10032689m.g.v1.0	Ciclev10022875m.g/Ciclev10016471m.g/Ciclev10013384m.g/Ciclev10032689m.g	cic:CICLE_v10022875mg/cic:CICLE_v10016471mg/cic:CICLE_v10013384mg/cic:CICLE_v10032689mg	4	2	Ciclev10013384m.g.v1.0/Ciclev10032689m.g.v1.0	2	Ciclev10022875m.g.v1.0/Ciclev10016471m.g.v1.0
cic00906	Carotenoid biosynthesis	3/266	35/4434	0.35109	0.838884	Ciclev10014639m.g.v1.0/Ciclev10028346m.g.v1.0/Ciclev10028355m.g.v1.0	Ciclev10014639m.g/Ciclev10028346m.g/Ciclev10028355m.g	cic:CICLE_v10014639mg/cic:CICLE_v10028346mg/cic:CICLE_v10028355mg	3	2	Ciclev10028346m.g.v1.0/Ciclev10028355m.g.v1.0	1	Ciclev10014639m.g.v1.0
cic00520	Amino sugar and nucleotide sugar metabolism	8/266	112/4434	0.357461	0.838884	Ciclev10014808m.g.v1.0/Ciclev10031983m.g.v1.0/Ciclev10004881m.g.v1.0/Ciclev10027856m.g.v1.0/Ciclev10023395m.g.v1.0/Ciclev10000939m.g.v1.0/Ciclev10028959m.g.v1.0/Ciclev10032349m.g.v1.0	Ciclev10014808m.g/Ciclev10031983m.g/Ciclev10004881m.g/Ciclev10027856m.g/Ciclev10023395m.g/Ciclev10000939m.g/Ciclev10028959m.g/Ciclev10032349m.g	cic:CICLE_v10014808mg/cic:CICLE_v10031983mg/cic:CICLE_v10004881mg/cic:CICLE_v10027856mg/cic:CICLE_v10023395mg/cic:CICLE_v10000939mg/cic:CICLE_v10028959mg/cic:CICLE_v10032349mg	8	0		8	Ciclev10014808m.g.v1.0/Ciclev10031983m.g.v1.0/Ciclev10004881m.g.v1.0/Ciclev10027856m.g.v1.0/Ciclev10023395m.g.v1.0/Ciclev10000939m.g.v1.0/Ciclev10028959m.g.v1.0/Ciclev10032349m.g.v1.0
cic00062	Fatty acid elongation	2/266	21/4434	0.361871	0.838884	Ciclev10008045m.g.v1.0/Ciclev10031329m.g.v1.0	Ciclev10008045m.g/Ciclev10031329m.g	cic:CICLE_v10008045mg/cic:CICLE_v10031329mg	2	0		2	Ciclev10008045m.g.v1.0/Ciclev10031329m.g.v1.0
cic00051	Fructose and mannose metabolism	4/266	52/4434	0.380377	0.862188	Ciclev10001262m.g.v1.0/Ciclev10015031m.g.v1.0/Ciclev10000939m.g.v1.0/Ciclev10008181m.g.v1.0	Ciclev10001262m.g/Ciclev10015031m.g/Ciclev10000939m.g/Ciclev10008181m.g	cic:CICLE_v10001262mg/cic:CICLE_v10015031mg/cic:CICLE_v10000939mg/cic:CICLE_v10008181mg	4	1	Ciclev10015031m.g.v1.0	3	Ciclev10001262m.g.v1.0/Ciclev10000939m.g.v1.0/Ciclev10008181m.g.v1.0
cic01210	2-Oxocarboxylic acid metabolism	4/266	55/4434	0.421905	0.935529	Ciclev10007130m.g.v1.0/Ciclev10008489m.g.v1.0/Ciclev10011760m.g.v1.0/Ciclev10001439m.g.v1.0	Ciclev10007130m.g/Ciclev10008489m.g/Ciclev10011760m.g/Ciclev10001439m.g	cic:CICLE_v10007130mg/cic:CICLE_v10008489mg/cic:CICLE_v10011760mg/cic:CICLE_v10001439mg	4	0		4	Ciclev10007130m.g.v1.0/Ciclev10008489m.g.v1.0/Ciclev10011760m.g.v1.0/Ciclev10001439m.g.v1.0
cic00071	Fatty acid degradation	3/266	40/4434	0.433818	0.941476	Ciclev10001502m.g.v1.0/Ciclev10027967m.g.v1.0/Ciclev10030097m.g.v1.0	Ciclev10001502m.g/Ciclev10027967m.g/Ciclev10030097m.g	cic:CICLE_v10001500mg/cic:CICLE_v10027967mg/cic:CICLE_v10030097mg	3	0		3	Ciclev10001502m.g.v1.0/Ciclev10027967m.g.v1.0/Ciclev10030097m.g.v1.0
cic00603	Glycosphingolipid biosynthesis - globo and isoglobo series	1/266	10/4434	0.461682	0.941886	Ciclev10014808m.g.v1.0	Ciclev10014808m.g	cic:CICLE_v10014808mg	1	0		1	Ciclev10014808m.g.v1.0
cic00250	Alanine, aspartate and glutamate metabolism	3/266	42/4434	0.465883	0.941886	Ciclev10025514m.g.v1.0/Ciclev10008489m.g.v1.0/Ciclev10011760m.g.v1.0	Ciclev10025514m.g/Ciclev10008489m.g/Ciclev10011760m.g	cic:CICLE_v10011621mg/cic:CICLE_v10008489mg/cic:CICLE_v10011760mg	3	0		3	Ciclev10025514m.g.v1.0/Ciclev10008489m.g.v1.0/Ciclev10011760m.g.v1.0
cic00860	Porphyrin and chlorophyll metabolism	3/266	43/4434	0.481617	0.941886	Ciclev10020061m.g.v1.0/Ciclev10004154m.g.v1.0/Ciclev10028147m.g.v1.0	Ciclev10020061m.g/Ciclev10004154m.g/Ciclev10028147m.g	cic:CICLE_v10020061mg/cic:CICLE_v10004154mg/cic:CICLE_v10028147mg	3	0		3	Ciclev10020061m.g.v1.0/Ciclev10004154m.g.v1.0/Ciclev10028147m.g.v1.0
cic00220	Arginine biosynthesis	2/266	27/4434	0.48814	0.941886	Ciclev10008489m.g.v1.0/Ciclev10011760m.g.v1.0	Ciclev10008489m.g/Ciclev10011760m.g	cic:CICLE_v10008489mg/cic:CICLE_v10011760mg	2	0		2	Ciclev10008489m.g.v1.0/Ciclev10011760m.g.v1.0
cic00790	Folate biosynthesis	2/266	27/4434	0.48814	0.941886	novel.1804/Ciclev10003552m.g.v1.0	-/Ciclev10003552m.g	cic:CICLE_v10020608mg/cic:CICLE_v10003552mg	2	1	Ciclev10003552m.g.v1.0	1	novel.1804
cic01212	Fatty acid metabolism	4/266	60/4434	0.489412	0.941886	Ciclev10001443m.g.v1.0/Ciclev10001415m.g.v1.0/Ciclev10027967m.g.v1.0/Ciclev10001459m.g.v1.0	Ciclev10001443m.g/Ciclev10001415m.g/Ciclev10027967m.g/Ciclev10001459m.g	cic:CICLE_v10001443mg/cic:CICLE_v10001415mg/cic:CICLE_v10027967mg/cic:CICLE_v10001459mg	4	2	Ciclev10001415m.g.v1.0/Ciclev10001459m.g.v1.0	2	Ciclev10001443m.g.v1.0/Ciclev10027967m.g.v1.0
cic00770	Pantothenate and CoA biosynthesis	2/266	28/4434	0.507661	0.958915	Ciclev10007130m.g.v1.0/Ciclev10001439m.g.v1.0	Ciclev10007130m.g/Ciclev10001439m.g	cic:CICLE_v10007130mg/cic:CICLE_v10001439mg	2	0		2	Ciclev10007130m.g.v1.0/Ciclev10001439m.g.v1.0
cic04933	AGE-RAGE signaling pathway in diabetic complications	1/266	12/4434	0.524478	0.972668	Ciclev10016801m.g.v1.0	Ciclev10016801m.g	cic:CICLE_v10016801mg	1	0		1	Ciclev10016801m.g.v1.0
cic00905	Brassinosteroid biosynthesis	1/266	14/4434	0.579972	0.999277	Ciclev10015033m.g.v1.0	Ciclev10015033m.g	cic:CICLE_v10015033mg	1	0		1	Ciclev10015033m.g.v1.0
cic00999	Biosynthesis of secondary metabolites - unclassified	1/266	14/4434	0.579972	0.999277	Ciclev10000921m.g.v1.0	Ciclev10000921m.g	cic:CICLE_v10000921mg	1	0		1	Ciclev10000921m.g.v1.0
cic04144	Endocytosis	8/266	137/4434	0.584813	0.999277	Ciclev10016601m.g.v1.0/Ciclev10021994m.g.v1.0/Ciclev10026997m.g.v1.0/Ciclev10030893m.g.v1.0/Ciclev10024940m.g.v1.0/Ciclev10010712m.g.v1.0/Ciclev10005824m.g.v1.0/Ciclev10027981m.g.v1.0	Ciclev10016601m.g/Ciclev10021994m.g/Ciclev10026997m.g/Ciclev10030893m.g/Ciclev10024940m.g/Ciclev10010712m.g/Ciclev10005824m.g/Ciclev10027981m.g	cic:CICLE_v10016601mg/cic:CICLE_v10021994mg/cic:CICLE_v10026997mg/cic:CICLE_v10030893mg/cic:CICLE_v10024940mg/cic:CICLE_v10010712mg/cic:CICLE_v10005824mg/cic:CICLE_v10027981mg	8	1	Ciclev10005824m.g.v1.0	7	Ciclev10016601m.g.v1.0/Ciclev10021994m.g.v1.0/Ciclev10026997m.g.v1.0/Ciclev10030893m.g.v1.0/Ciclev10024940m.g.v1.0/Ciclev10010712m.g.v1.0/Ciclev10027981m.g.v1.0
cic01230	Biosynthesis of amino acids	12/266	211/4434	0.621045	0.999277	Ciclev10032014m.g.v1.0/Ciclev10001793m.g.v1.0/Ciclev10033603m.g.v1.0/Ciclev10007130m.g.v1.0/Ciclev10008489m.g.v1.0/Ciclev10011760m.g.v1.0/Ciclev10015031m.g.v1.0/Ciclev10008181m.g.v1.0/Ciclev10028779m.g.v1.0/Ciclev10026175m.g.v1.0/Ciclev10001439m.g.v1.0/Ciclev10000651m.g.v1.0	Ciclev10032014m.g/Ciclev10001793m.g/Ciclev10033603m.g/Ciclev10007130m.g/Ciclev10008489m.g/Ciclev10011760m.g/Ciclev10015031m.g/Ciclev10008181m.g/Ciclev10028779m.g/Ciclev10026175m.g/Ciclev10001439m.g/Ciclev10000651m.g	cic:CICLE_v10032014mg/cic:CICLE_v10001793mg/cic:CICLE_v10033603mg/cic:CICLE_v10007130mg/cic:CICLE_v10008489mg/cic:CICLE_v10011760mg/cic:CICLE_v10015031mg/cic:CICLE_v10008181mg/cic:CICLE_v10028779mg/cic:CICLE_v10026175mg/cic:CICLE_v10001439mg/cic:CICLE_v10000651mg	12	5	Ciclev10001793m.g.v1.0/Ciclev10033603m.g.v1.0/Ciclev10015031m.g.v1.0/Ciclev10026175m.g.v1.0/Ciclev10000651m.g.v1.0	7	Ciclev10032014m.g.v1.0/Ciclev10007130m.g.v1.0/Ciclev10008489m.g.v1.0/Ciclev10011760m.g.v1.0/Ciclev10008181m.g.v1.0/Ciclev10028779m.g.v1.0/Ciclev10001439m.g.v1.0
cic00450	Selenocompound metabolism	1/266	16/4434	0.629012	0.999277	Ciclev10001007m.g.v1.0	Ciclev10001007m.g	cic:CICLE_v10001007mg	1	0		1	Ciclev10001007m.g.v1.0
cic03020	RNA polymerase	2/266	35/4434	0.630138	0.999277	Ciclev10028849m.g.v1.0/Ciclev10026494m.g.v1.0	Ciclev10028849m.g/Ciclev10026494m.g	cic:CICLE_v10028849mg/cic:CICLE_v10026494mg	2	2	Ciclev10028849m.g.v1.0/Ciclev10026494m.g.v1.0	0
cic04145	Phagosome	4/266	72/4434	0.635522	0.999277	Ciclev10001552m.g.v1.0/Ciclev10004755m.g.v1.0/Ciclev10016801m.g.v1.0/Ciclev10001298m.g.v1.0	Ciclev10001552m.g/Ciclev10004755m.g/Ciclev10016801m.g/Ciclev10001298m.g	cic:CICLE_v100015522m/cic:CICLE_v10004755mg/cic:CICLE_v10016801mg/cic:CICLE_v10001298mg	4	0		4	Ciclev10001552m.g.v1.0/Ciclev10004755m.g.v1.0/Ciclev10016801m.g.v1.0/Ciclev10001298m.g.v1.0
cic00630	Glyoxylate and dicarboxylate metabolism	3/266	55/4434	0.650151	0.999277	Ciclev10015533m.g.v1.0/Ciclev10025922m.g.v1.0/Ciclev10016114m.g.v1.0	Ciclev10015533m.g/Ciclev10025922m.g/Ciclev10016114m.g	cic:CICLE_v10015533mg/cic:CICLE_v10025729mg/cic:CICLE_v10016114mg	3	2	Ciclev10015533m.g.v1.0/Ciclev10025922m.g.v1.0	1	Ciclev10016114m.g.v1.0
cic00340	Histidine metabolism	1/266	17/4434	0.651348	0.999277	Ciclev10028779m.g.v1.0	Ciclev10028779m.g	cic:CICLE_v10028779mg	1	0		1	Ciclev10028779m.g.v1.0
cic00670	One carbon pool by folate	1/266	17/4434	0.651348	0.999277	Ciclev10014598m.g.v1.0	Ciclev10014598m.g	cic:CICLE_v10014598mg	1	0		1	Ciclev10014598m.g.v1.0
cic00053	Ascorbate and aldarate metabolism	2/266	38/4434	0.674897	0.999277	Ciclev10028842m.g.v1.0/Ciclev10028779m.g.v1.0	Ciclev10028842m.g/Ciclev10028779m.g	cic:CICLE_v10028842mg/cic:CICLE_v10028779mg	2	0		2	Ciclev10028842m.g.v1.0/Ciclev10028779m.g.v1.0
cic00380	Tryptophan metabolism	2/266	41/4434	0.715167	0.999277	Ciclev10014992m.g.v1.0/Ciclev10018100m.g.v1.0	Ciclev10014992m.g/Ciclev10018100m.g	cic:CICLE_v10014992mg/cic:CICLE_v10018100mg	2	0		2	Ciclev10014992m.g.v1.0/Ciclev10018100m.g.v1.0
cic00650	Butanoate metabolism	1/266	21/4434	0.728071	0.999277	Ciclev10007130m.g.v1.0	Ciclev10007130m.g	cic:CICLE_v10007130mg	1	0		1	Ciclev10007130m.g.v1.0
cic00909	Sesquiterpenoid and triterpenoid biosynthesis	1/266	21/4434	0.728071	0.999277	Ciclev10013952m.g.v1.0	Ciclev10013952m.g	cic:CICLE_v10013952mg	1	0		1	Ciclev10013952m.g.v1.0
cic04626	Plant-pathogen interaction	12/266	231/4434	0.742136	0.999277	Ciclev10024251m.g.v1.0/Ciclev10018646m.g.v1.0/Ciclev10003411m.g.v1.0/Ciclev10006936m.g.v1.0/Ciclev10004456m.g.v1.0/Ciclev10025418m.g.v1.0/Ciclev10029459m.g.v1.0/Ciclev10005743m.g.v1.0/Ciclev10016995m.g.v1.0/Ciclev10002732m.g.v1.0/novel.45/Ciclev10008771m.g.v1.0	Ciclev10024251m.g/Ciclev10018646m.g/Ciclev10003411m.g/Ciclev10006936m.g/Ciclev10004456m.g/Ciclev10025418m.g/Ciclev10029459m.g/Ciclev10005743m.g/Ciclev10016995m.g/Ciclev10002732m.g/-/Ciclev10008771m.g	cic:CICLE_v10024251mg/cic:CICLE_v10024610mg/cic:CICLE_v10003411mg/cic:CICLE_v10006936mg/cic:CICLE_v10004456mg/cic:CICLE_v10025418mg/cic:CICLE_v10029459mg/cic:CICLE_v10005743mg/cic:CICLE_v10016995mg/cic:CICLE_v10002732mg/cic:CICLE_v10007349mg/cic:CICLE_v10008771mg	12	4	Ciclev10003411m.g.v1.0/Ciclev10006936m.g.v1.0/Ciclev10016995m.g.v1.0/Ciclev10002732m.g.v1.0	8	Ciclev10024251m.g.v1.0/Ciclev10018646m.g.v1.0/Ciclev10004456m.g.v1.0/Ciclev10025418m.g.v1.0/Ciclev10029459m.g.v1.0/Ciclev10005743m.g.v1.0/novel.45/Ciclev10008771m.g.v1.0
cic00195	Photosynthesis	2/266	44/4434	0.75118	0.999277	Ciclev10026034m.g.v1.0/Ciclev10009429m.g.v1.0	Ciclev10026034m.g/Ciclev10009429m.g	cic:CICLE_v10026034mg/cic:CICLE_v10009429mg	2	0		2	Ciclev10026034m.g.v1.0/Ciclev10009429m.g.v1.0
cic03022	Basal transcription factors	2/266	44/4434	0.75118	0.999277	Ciclev10018975m.g.v1.0/Ciclev10004140m.g.v1.0	Ciclev10018975m.g/Ciclev10004140m.g	cic:CICLE_v10018975mg/cic:CICLE_v10004140mg	2	2	Ciclev10018975m.g.v1.0/Ciclev10004140m.g.v1.0	0
cic00190	Oxidative phosphorylation	4/266	84/4434	0.751793	0.999277	Ciclev10011010m.g.v1.0/Ciclev10011040m.g.v1.0/Ciclev10002758m.g.v1.0/Ciclev10005587m.g.v1.0	Ciclev10011010m.g/Ciclev10011040m.g/Ciclev10002758m.g/Ciclev10005587m.g	cic:CICLE_v10011010mg/cic:CICLE_v10011040mg/cic:CICLE_v10002758mg/cic:CICLE_v10005587mg	4	4	Ciclev10011010m.g.v1.0/Ciclev10011040m.g.v1.0/Ciclev10002758m.g.v1.0/Ciclev10005587m.g.v1.0	0
cic00730	Thiamine metabolism	1/266	23/4434	0.759868	0.999277	Ciclev10008765m.g.v1.0	Ciclev10008765m.g	cic:CICLE_v10008765mg	1	1	Ciclev10008765m.g.v1.0	0
cic00280	Valine, leucine and isoleucine degradation	2/266	46/4434	0.772961	0.999277	Ciclev10025514m.g.v1.0/Ciclev10001439m.g.v1.0	Ciclev10025514m.g/Ciclev10001439m.g	cic:CICLE_v10011621mg/cic:CICLE_v10001439mg	2	0		2	Ciclev10025514m.g.v1.0/Ciclev10001439m.g.v1.0
cic03040	Spliceosome	8/266	164/4434	0.778174	0.999277	Ciclev10019645m.g.v1.0/Ciclev10030893m.g.v1.0/Ciclev10021673m.g.v1.0/Ciclev10019296m.g.v1.0/Ciclev10032914m.g.v1.0/Ciclev10031363m.g.v1.0/Ciclev10019850m.g.v1.0/Ciclev10027981m.g.v1.0	Ciclev10019645m.g/Ciclev10030893m.g/Ciclev10021673m.g/Ciclev10019296m.g/Ciclev10032914m.g/Ciclev10031363m.g/Ciclev10019850m.g/Ciclev10027981m.g	cic:CICLE_v10019645mg/cic:CICLE_v10030893mg/cic:CICLE_v10021673mg/cic:CICLE_v10019296mg/cic:CICLE_v10032914mg/cic:CICLE_v10031363mg/cic:CICLE_v10019850mg/cic:CICLE_v10027981mg	8	6	Ciclev10019645m.g.v1.0/Ciclev10021673m.g.v1.0/Ciclev10019296m.g.v1.0/Ciclev10032914m.g.v1.0/Ciclev10031363m.g.v1.0/Ciclev10019850m.g.v1.0	2	Ciclev10030893m.g.v1.0/Ciclev10027981m.g.v1.0
cic00400	Phenylalanine, tyrosine and tryptophan biosynthesis	2/266	47/4434	0.783217	0.999277	Ciclev10008489m.g.v1.0/Ciclev10011760m.g.v1.0	Ciclev10008489m.g/Ciclev10011760m.g	cic:CICLE_v10008489mg/cic:CICLE_v10011760mg	2	0		2	Ciclev10008489m.g.v1.0/Ciclev10011760m.g.v1.0
cic04146	Peroxisome	4/266	88/4434	0.783586	0.999277	Ciclev10008459m.g.v1.0/Ciclev10015533m.g.v1.0/Ciclev10027967m.g.v1.0/Ciclev10025922m.g.v1.0	Ciclev10008459m.g/Ciclev10015533m.g/Ciclev10027967m.g/Ciclev10025922m.g	cic:CICLE_v10008459mg/cic:CICLE_v10015533mg/cic:CICLE_v10027967mg/cic:CICLE_v10025729mg	4	2	Ciclev10015533m.g.v1.0/Ciclev10025922m.g.v1.0	2	Ciclev10008459m.g.v1.0/Ciclev10027967m.g.v1.0
cic03018	RNA degradation	5/266	112/4434	0.81188	0.999277	Ciclev10014159m.g.v1.0/Ciclev10015031m.g.v1.0/Ciclev10008181m.g.v1.0/Ciclev10008854m.g.v1.0/Ciclev10000087m.g.v1.0	Ciclev10014159m.g/Ciclev10015031m.g/Ciclev10008181m.g/Ciclev10008854m.g/Ciclev10000087m.g	cic:CICLE_v10014159mg/cic:CICLE_v10015031mg/cic:CICLE_v10008181mg/cic:CICLE_v10008854mg/cic:CICLE_v10000087mg	5	4	Ciclev10014159m.g.v1.0/Ciclev10015031m.g.v1.0/Ciclev10008854m.g.v1.0/Ciclev10000087m.g.v1.0	1	Ciclev10008181m.g.v1.0
cic00600	Sphingolipid metabolism	1/266	27/4434	0.812776	0.999277	Ciclev10018742m.g.v1.0	Ciclev10018742m.g	cic:CICLE_v10018742mg	1	1	Ciclev10018742m.g.v1.0	0
cic00908	Zeatin biosynthesis	1/266	28/4434	0.824077	0.999277	Ciclev10010713m.g.v1.0	Ciclev10010713m.g	cic:CICLE_v10010713mg	1	0		1	Ciclev10010713m.g.v1.0
cic00900	Terpenoid backbone biosynthesis	2/266	53/4434	0.836604	0.999277	Ciclev10020061m.g.v1.0/Ciclev10015368m.g.v1.0	Ciclev10020061m.g/Ciclev10015368m.g	cic:CICLE_v10020061mg/cic:CICLE_v10015368mg	2	0		2	Ciclev10020061m.g.v1.0/Ciclev10015368m.g.v1.0
cic00330	Arginine and proline metabolism	2/266	54/4434	0.844254	0.999277	Ciclev10008489m.g.v1.0/Ciclev10011760m.g.v1.0	Ciclev10008489m.g/Ciclev10011760m.g	cic:CICLE_v10008489mg/cic:CICLE_v10011760mg	2	0		2	Ciclev10008489m.g.v1.0/Ciclev10011760m.g.v1.0
cic00513	Various types of N-glycan biosynthesis	1/266	31/4434	0.854061	0.999277	Ciclev10014808m.g.v1.0	Ciclev10014808m.g	cic:CICLE_v10014808mg	1	0		1	Ciclev10014808m.g.v1.0
cic00562	Inositol phosphate metabolism	2/266	57/4434	0.865296	0.999277	Ciclev10031232m.g.v1.0/Ciclev10028779m.g.v1.0	Ciclev10031232m.g/Ciclev10028779m.g	cic:CICLE_v10031232mg/cic:CICLE_v10028779mg	2	0		2	Ciclev10031232m.g.v1.0/Ciclev10028779m.g.v1.0
cic03420	Nucleotide excision repair	2/266	57/4434	0.865296	0.999277	Ciclev10019317m.g.v1.0/Ciclev10018975m.g.v1.0	Ciclev10019317m.g/Ciclev10018975m.g	cic:CICLE_v10019317mg/cic:CICLE_v10018975mg	2	1	Ciclev10018975m.g.v1.0	1	Ciclev10019317m.g.v1.0
cic04130	SNARE interactions in vesicular transport	1/266	34/4434	0.87895	0.999277	Ciclev10021255m.g.v1.0	Ciclev10021255m.g	cic:CICLE_v10021255mg	1	0		1	Ciclev10021255m.g.v1.0
cic00310	Lysine degradation	1/266	35/4434	0.886268	0.999277	Ciclev10008459m.g.v1.0	Ciclev10008459m.g	cic:CICLE_v10008459mg	1	0		1	Ciclev10008459m.g.v1.0
cic03430	Mismatch repair	1/266	36/4434	0.893145	0.999277	Ciclev10019317m.g.v1.0	Ciclev10019317m.g	cic:CICLE_v10019317mg	1	0		1	Ciclev10019317m.g.v1.0
cic04141	Protein processing in endoplasmic reticulum	8/266	194/4434	0.905643	0.999277	Ciclev10030893m.g.v1.0/Ciclev10004456m.g.v1.0/Ciclev10017121m.g.v1.0/Ciclev10015325m.g.v1.0/Ciclev10007326m.g.v1.0/Ciclev10001298m.g.v1.0/Ciclev10032971m.g.v1.0/Ciclev10027981m.g.v1.0	Ciclev10030893m.g/Ciclev10004456m.g/Ciclev10017121m.g/Ciclev10015325m.g/Ciclev10007326m.g/Ciclev10001298m.g/Ciclev10032971m.g/Ciclev10027981m.g	cic:CICLE_v10030893mg/cic:CICLE_v10004456mg/cic:CICLE_v10017121mg/cic:CICLE_v10015325mg/cic:CICLE_v10007326mg/cic:CICLE_v10001298mg/cic:CICLE_v10032971mg/cic:CICLE_v10027981mg	8	3	Ciclev10017121m.g.v1.0/Ciclev10007326m.g.v1.0/Ciclev10032971m.g.v1.0	5	Ciclev10030893m.g.v1.0/Ciclev10004456m.g.v1.0/Ciclev10015325m.g.v1.0/Ciclev10001298m.g.v1.0/Ciclev10027981m.g.v1.0
cic04120	Ubiquitin mediated proteolysis	4/266	114/4434	0.918806	0.999277	Ciclev10011683m.g.v1.0/Ciclev10031523m.g.v1.0/Ciclev10011710m.g.v1.0/Ciclev10002737m.g.v1.0	Ciclev10011683m.g/Ciclev10031523m.g/Ciclev10011710m.g/Ciclev10002737m.g	cic:CICLE_v10011683mg/cic:CICLE_v10031523mg/cic:CICLE_v10011710mg/cic:CICLE_v10002737mg	4	0		4	Ciclev10011683m.g.v1.0/Ciclev10031523m.g.v1.0/Ciclev10011710m.g.v1.0/Ciclev10002737m.g.v1.0
cic00020	Citrate cycle (TCA cycle)	1/266	41/4434	0.921791	0.999277	Ciclev10016114m.g.v1.0	Ciclev10016114m.g	cic:CICLE_v10016114mg	1	0		1	Ciclev10016114m.g.v1.0
cic00410	beta-Alanine metabolism	1/266	43/4434	0.930977	0.999277	Ciclev10004473m.g.v1.0	Ciclev10004473m.g	cic:CICLE_v10004473mg	1	0		1	Ciclev10004473m.g.v1.0
cic00620	Pyruvate metabolism	2/266	71/4434	0.933085	0.999277	Ciclev10031559m.g.v1.0/Ciclev10016114m.g.v1.0	Ciclev10031559m.g/Ciclev10016114m.g	cic:CICLE_v10031559mg/cic:CICLE_v10016114mg	2	1	Ciclev10031559m.g.v1.0	1	Ciclev10016114m.g.v1.0
cic00460	Cyanoamino acid metabolism	1/266	47/4434	0.946248	0.999277	Ciclev10028018m.g.v1.0	Ciclev10028018m.g	cic:CICLE_v10028018mg	1	0		1	Ciclev10028018m.g.v1.0
cic04070	Phosphatidylinositol signaling system	1/266	47/4434	0.946248	0.999277	Ciclev10028779m.g.v1.0	Ciclev10028779m.g	cic:CICLE_v10028779mg	1	0		1	Ciclev10028779m.g.v1.0
cic03440	Homologous recombination	1/266	51/4434	0.95815	0.999277	Ciclev10019317m.g.v1.0	Ciclev10019317m.g	cic:CICLE_v10019317mg	1	0		1	Ciclev10019317m.g.v1.0
cic00970	Aminoacyl-tRNA biosynthesis	1/266	52/4434	0.960689	0.999277	Ciclev10030945m.g.v1.0	Ciclev10030945m.g	cic:CICLE_v10030945mg	1	0		1	Ciclev10030945m.g.v1.0
cic00230	Purine metabolism	2/266	90/4434	0.97526	0.999277	Ciclev10001007m.g.v1.0/Ciclev10016037m.g.v1.0	Ciclev10001007m.g/Ciclev10016037m.g	cic:CICLE_v10001007mg/cic:CICLE_v10016037mg	2	0		2	Ciclev10001007m.g.v1.0/Ciclev10016037m.g.v1.0
cic00561	Glycerolipid metabolism	1/266	69/4434	0.98647	0.999277	Ciclev10028764m.g.v1.0	Ciclev10028764m.g	cic:CICLE_v10028764mg	1	0		1	Ciclev10028764m.g.v1.0
cic03013	RNA transport	3/266	149/4434	0.995028	0.999277	Ciclev10023744m.g.v1.0/novel.1893/Ciclev10007631m.g.v1.0	Ciclev10023744m.g/-/Ciclev10007631m.g	cic:CICLE_v10023744mg/cic:CICLE_v10006329mg/cic:CICLE_v10007631mg	3	2	Ciclev10023744m.g.v1.0/Ciclev10007631m.g.v1.0	1	novel.1893
cic03010	Ribosome	5/266	243/4434	0.999277	0.999277	Ciclev10006194m.g.v1.0/Ciclev10027521m.g.v1.0/Ciclev10016378m.g.v1.0/novel.1370/Ciclev10006280m.g.v1.0	Ciclev10006194m.g/Ciclev10027521m.g/Ciclev10016378m.g/-/Ciclev10006280m.g	cic:CICLE_v10006194mg/cic:CICLE_v10027521mg/cic:CICLE_v10016378mg/cic:CICLE_v10029476mg/cic:CICLE_v10006280mg	5	5	Ciclev10006194m.g.v1.0/Ciclev10027521m.g.v1.0/Ciclev10016378m.g.v1.0/novel.1370/Ciclev10006280m.g.v1.0	0
