# Supplementary material for: Cocktail Therapy of Fosthiazate and Cupric-Ammoniun Complex for Citrus Huanglongbing
Source: Front Plant Sci. 2021 Mar 31;12:643971. doi: 10.3389/fpls.2021.643971 (PMC8044827; doi:10.3389/fpls.2021.643971)
Supplement: Supplementary file 3 [file Data_Sheet_3.xlsx]

## Sheet: Sheet1
gene_id	A_1_count	A_2_count	A_3_count	B_1_count	B_2_count	B_3_count	C_1_count	C_2_count	C_3_count	A_1_fpkm	A_2_fpkm	A_3_fpkm	C_1_fpkm	C_2_fpkm	C_3_fpkm	B_1_fpkm	B_2_fpkm	B_3_fpkm	BvsA_B	BvsA_A	BvsA_log2FoldChange	BvsA_pvalue	BvsA_padj	gene_description	tf_family
Ciclev10013351m.g.v1.0	360	818	23	4	46	28	58	0	0	27.8719	71.1772	2.14115	27.1519	0	0	0.443764	3.5266	2.31162	32.7088	384.132	-3.56321	0.00640754	0.0692397	PF14299:Phloem protein 2	-
Ciclev10003813m.g.v1.0	3	0	0	0	0	0	0	0	0	0.304311	0	0	0	0	0	0	0	0	0	1.00144	-2.35582	0.554877	1	PF14299:Phloem protein 2	-
Ciclev10002074m.g.v1.0	53	58	18	10	11	5	0	0	0	3.14419	3.86708	1.28398	0	0	0	0.850081	0.646188	0.316297	10.2545	41.1997	-2.03946	0.0362545	0.209246	PF14299:Phloem protein 2	-
Ciclev10013447m.g.v1.0	174	207	203	111	23	0	6	2	0	13.424	17.9484	18.8314	2.79893	2.95116	0	12.2711	1.75709	0	47.3702	182.599	-1.94678	0.170862	0.47773	PF14299:Phloem protein 2	-
Ciclev10013632m.g.v1.0	677	563	742	633	317	225	74	4	0	50.7992	47.4788	66.9462	33.5744	5.74062	0	68.0612	23.5538	18.003	426.57	620.233	-0.540927	0.356777	0.670884	PF14299:Phloem protein 2	-
Ciclev10016974m.g.v1.0	519	470	640	287	527	252	133	86	0	36.8806	37.5363	54.6845	57.1466	116.885	0	29.224	37.083	19.0952	433.408	508.388	-0.232421	0.729953	0.899849	PF14299:Phloem protein 2	-
Ciclev10005647m.g.v1.0	15	25	44	13	23	29	4	4	0	1.21875	2.2829	4.29863	1.96513	6.21605	0	1.51354	1.85048	2.51255	23.8023	25.7485	-0.128228	0.878088	0.958587	PF14299:Phloem protein 2|PF12937:F-box-like	-
Ciclev10003623m.g.v1.0	1	2	2	5	0	0	0	0	0	0.12665	0.284681	0.304571	0	0	0	0.907408	0	0	1.59169	1.54818	0.0595019	0.983355	1	PF14299:Phloem protein 2	-
Ciclev10032829m.g.v1.0	6050	4196	1110	1314	2751	7905	116	459	0	335.025	261.144	73.9092	38.8407	486.144	0	104.267	150.85	466.785	3937.39	3663.96	0.103864	0.90359	0.968342	PF14299:Phloem protein 2	-
Ciclev10012338m.g.v1.0	1881	2763	1409	2100	1837	1613	443	121	0	82.3721	135.986	74.1919	117.301	101.346	0	131.777	79.6589	75.3215	2054.06	1909.2	0.105178	0.843191	0.945421	PF14299:Phloem protein 2	-
Ciclev10021489m.g.v1.0	2826	2479	1942	1821	3180	902	296	66	0	132.305	130.438	109.322	83.7924	59.0989	0	122.164	147.423	45.0303	2480.9	2291.37	0.114333	0.882025	0.959949	PF14299:Phloem protein 2	-
Ciclev10005617m.g.v1.0	3724	1378	773	697	3625	753	242	146	0	219.734	91.3817	54.8429	86.3397	164.767	0	58.9315	211.801	47.3778	2316.73	1902.72	0.283794	0.789038	0.925331	PF14299:Phloem protein 2	-
Ciclev10005650m.g.v1.0	143	127	322	228	197	178	19	2	0	7.49567	7.48172	20.2948	6.02194	2.0051	0	17.1253	10.2253	9.9492	222.488	181.929	0.287355	0.631976	0.852251	PF14299:Phloem protein 2	-
Ciclev10016359m.g.v1.0	176	302	281	365	208	318	62	7	0	14.7372	28.4206	28.2919	31.3908	11.2107	0	43.7949	17.2464	28.3938	308.688	235.973	0.386398	0.35131	0.666906	PF14299:Phloem protein 2	-
Ciclev10005661m.g.v1.0	72	5	2	3	10	130	0	10	0	5.23523	0.408599	0.174859	0	13.907	0	0.312574	0.720008	10.0795	40.388	26.1923	0.630107	0.702928	0.886485	PF14299:Phloem protein 2	-
Ciclev10005659m.g.v1.0	77	68	56	111	25	233	22	12	0	5.21247	5.17351	4.55822	9.005	15.5369	0	10.7672	1.67582	16.8191	109.715	63.4793	0.795661	0.277038	0.600299	PF14299:Phloem protein 2	-
Ciclev10006747m.g.v1.0	42	20	32	100	28	26	13	3	0	3.48575	1.86552	3.19338	6.52377	4.7621	0	11.8925	2.30112	2.30098	53.3248	29.6765	0.846395	0.31754	0.638506	PF00646:F-box domain|PF14299:Phloem protein 2	F-box
Ciclev10012262m.g.v1.0	74	110	184	57	250	237	35	13	0	4.47069	7.46894	13.3664	12.7855	15.0216	0	4.93453	14.9561	15.2681	211.306	113.154	0.898088	0.276126	0.599172	PF14299:Phloem protein 2	-
Ciclev10021409m.g.v1.0	189	768	570	2524	40	270	220	6	0	7.40358	33.8115	26.8478	52.1088	4.49533	0	141.676	1.55158	11.2781	895.449	471.447	0.925694	0.446418	0.744767	PF14299:Phloem protein 2	-
Ciclev10006729m.g.v1.0	2	7	8	23	0	10	0	1	0	0.166619	0.655415	0.801381	0	1.5934	0	2.74569	0	0.888359	9.95261	5.21063	0.944463	0.576354	0.823072	PF14299:Phloem protein 2	-
Ciclev10005646m.g.v1.0	29	21	44	63	7	129	26	8	0	2.38873	1.94407	4.35789	12.9494	12.6035	0	7.43597	0.570954	11.3306	57.6555	29.1641	0.990771	0.29516	0.617689	PF14299:Phloem protein 2	-
Ciclev10003574m.g.v1.0	10	1	15	47	0	4	3	0	0	0.422166	0.0474468	0.761428	0.765796	0	0	2.84321	0	0.180068	16.0143	8.04345	0.998271	0.601916	0.838205	PF14299:Phloem protein 2|PF00646:F-box domain	F-box
Ciclev10006558m.g.v1.0	5	4	6	20	0	11	0	1	0	0.41185	0.370299	0.594257	0	1.57543	0	2.36063	0	0.966174	9.26067	4.68324	0.999732	0.537274	0.799423	PF14299:Phloem protein 2	-
Ciclev10003370m.g.v1.0	12	10	11	20	28	0	5	0	0	0.995929	0.932761	1.09772	2.50914	0	0	2.37851	2.30112	0	21.0176	10.3703	1.00901	0.530095	0.794743	PF14299:Phloem protein 2	-
Ciclev10006497m.g.v1.0	10	4	2	14	0	27	0	0	0	1.61106	0.724261	0.387432	0	0	0	3.23198	0	4.63841	11.5599	5.18141	1.17695	0.489521	0.770447	PF14299:Phloem protein 2	-
Ciclev10033500m.g.v1.0	2	0	0	0	0	7	0	1	0	0.2672	0	0	0	2.55527	0	0	0	0.997237	1.84157	0.667625	1.49809	0.701429	1	PF14299:Phloem protein 2	-
Ciclev10005557m.g.v1.0	765	377	224	77	2295	187	3	117	0	42.079	23.3061	14.8152	0.997777	123.089	0	6.06908	125.003	10.9683	1274.55	439.488	1.53577	0.243596	0.568077	PF14299:Phloem protein 2	-
Ciclev10003607m.g.v1.0	10	6	0	19	19	2	0	24	0	0.782515	0.527676	0	0	35.9199	0	2.13047	1.47225	0.166885	16.5162	5.22488	1.65638	0.33967	0.658315	PF14299:Phloem protein 2	-
Ciclev10016835m.g.v1.0	9	11	18	49	29	28	8	0	0	0.977821	1.34318	2.35149	5.25551	0	0	7.62853	3.11996	3.24391	38.1389	11.7324	1.69142	0.0269953	0.175522	PF14299:Phloem protein 2	-
Ciclev10003407m.g.v1.0	13	1	4	24	1	130	0	11	0	0.962282	0.0831922	0.356019	0	15.5734	0	2.54565	0.0732981	10.2611	42.3639	5.82492	2.87248	0.0655043	0.293868	PF14299:Phloem protein 2	-
Ciclev10002204m.g.v1.0	16	1	0	5	1	173	3	20	0	1.34317	0.0943482	0	1.52279	32.1123	0	0.601462	0.0831274	15.4864	47.628	5.65546	3.08186	NA	1	PF14299:Phloem protein 2	-
Ciclev10002065m.g.v1.0	0	0	0	0	0	7	0	0	0	0	0	0	0	0	0	0	0	0.454718	1.84157	0	3.43613	0.385383	1	PF14299:Phloem protein 2	-
Ciclev10005670m.g.v1.0	0	0	0	0	0	599	0	50	0	0	0	0	0	74.2146	0	0	0	49.5689	157.586	0	23.5145	NA	1	PF14299:Phloem protein 2	-
Ciclev10006557m.g.v1.0	0	0	0	0	0	0	0	0	0	0	0	0	0	0	0	0	0	0	--	--	--	--	--	PF14299:Phloem protein 2	-
Ciclev10003100m.g.v1.0	0	1	0	0	0	0	0	0	0	0	0.086101	0	0	0	0	0	0	0	--	--	--	--	--	PF14299:Phloem protein 2	-
		There exist 35 PP2 genes. Among them, 26 were up regulated , 7 were down regulated and 2 were undetected. Only three genes showed significant difference (p values <0.05). 2 of them were significantly down regulated and one was up regulated. Their padj values weren't smaller than 0.05. (padj is the adjusted value for p. The smaller the padj, the more reliable its corresponding p value is)
